# Supplementary material for: Transcriptional Regulation of Ribosome Components Are Determined by Stress According to Cellular Compartments in Arabidopsis thaliana
Source: PubMed Central journal article supplement (PMC3229498; doi:10.1371/journal.pone.0028070), 2011-12-02
Supplement: pone.0028070.s001.pdf [file pone.0028070.s001.pdf]

| Gene reference number (AGI) | Gene Common Name   | Gene model type on TAIR 7 | Phylogeny | Subunit | CATMA ID     | Affymetrics ID | Predicted Protein localisation | ms/ms localisation evidences | GFP localisation evidences |
|-----------------------------|--------------------|---------------------------|-----------|---------|--------------|----------------|--------------------------------|------------------------------|----------------------------|
| AT5G24490                   | PSRP-1             | protein coding            |           |         |              | 249742_at      | plastid                        | 9, 2                         |                            |
| AT3G52150                   | PSRP-2             | protein coding            |           |         | CATMA3A45070 | 252032_at      | plastid                        | 9, 27, 6, 2, 14, 1, 15       |                            |
| AT1G68590                   | PSRP-3             | protein coding            |           |         |              | 262283_at      | plastid                        | 9, 2, 14                     |                            |
| AT5G15760                   | PSRP-3             | protein coding            |           |         | CATMA5A14030 | 246517_at      | plastid                        |                              |                            |
| AT2G38140                   | PSRP-4             | protein coding            |           |         | CATMA2A36435 | 267088_at      | plastid                        | 9                            | 26                         |
| AT3G56910                   | PSRP-5             | protein coding            |           |         |              | 246294_at      | plastid                        | 9, 2, 14, 1                  |                            |
| AT5G17870                   | PSRP-6             | protein coding            |           |         | CATMA5A16150 | 250058_at      | plastid                        |                              |                            |
| AT4G29060                   | PSRP-7             | protein coding            |           |         |              |                | plastid                        |                              |                            |
| AT1G08360                   | RPL10aA            | protein coding            | euk       | Large   | CATMA1A07350 | 261694_at      | cytosol                        | 8, 5                         |                            |
| AT2G27530                   | RPL10aB            | protein coding            | euk       | Large   | CATMA2A25970 | 266210_at      | cytosol                        | 4, 5                         |                            |
| AT5G22440                   | RPL10aC            | protein coding            | euk       | Large   | CATMA5A19900 | 249945_at      | cytosol                        | 3, 5                         | 3                          |
| AT2G42650                   | RPL10a related     | protein coding            | euk       | Large   | CATMA2A41050 |                | nucleus                        |                              |                            |
| AT3G58660                   | RPL10a related     | protein coding            | euk       | Large   | CATMA3A51670 | 251538_at      | nucleus                        | 3                            | 3                          |
| AT1G06380                   | RPL10a related     | protein coding            | prok      | Large   | CATMA1A05420 | 259392_at      | plastid                        | 9, 1                         |                            |
| AT2G42710                   | RPL1               | protein coding            | prok      | Large   | CATMA2A41110 | 263975_at      | mitochondrion                  |                              |                            |
| AT3G63490                   | RPL1               | protein coding            | prok      | Large   |              | 251120_at      | plastid                        | 11, 9, 6, 13, 2              |                            |
| AT2G27535                   | RPL10aD            | protein coding            | euk       | Large   | CATMA2A25980 |                | cytosol                        |                              |                            |
| AT1G14320                   | RPL10A             | protein coding            | euk       | Large   | CATMA1B13325 | 261490_at      | cytosol                        | 7                            |                            |
| AT1G26910                   | RPL10B             | protein coding            | euk       | Large   | CATMA1A25120 | 263686_at      | cytosol                        | 1                            |                            |
| AT1G66580                   | RPL10C             | protein coding            | euk       | Large   | CATMA1A55860 | 256385_at      | cytosol                        | 7, 18, 5                     |                            |
| AT5G13510                   | RPL10              | protein coding            | prok      | Large   |              | 245852_at      | plastid                        | 9, 6                         |                            |
| AT3G12370                   | RPL10              | protein coding            | prok      | Large   | CATMA3A11320 | 256234_at      | mitochondrion                  |                              |                            |
| AT1G32990                   | RPL11              | protein coding            | prok      | Large   | CATMA1A31300 | 261190_at      | plastid                        | 9, 6, 2, 1                   |                            |
| AT4G35490                   | RPL11              | protein coding            | prok      | Large   | CATMA4A37150 | 253138_at      | mitochondrion                  |                              |                            |
| AT5G51610                   | RPL11              | protein coding            | prok      | Large   | CATMA5A47540 | 248414_at      | plastid                        |                              |                            |
| AT3G58700                   | RPL11B             | protein coding            | euk       | Large   |              | 251552_at      | cytosol                        | 18                           |                            |
| AT5G45775                   | RPL11D             | protein coding            | euk       | Large   | CATMA5A41760 |                | cytosol                        | 18                           |                            |
| AT1G70190                   | RPL12              | protein coding            | prok      | Large   | CATMA1A59480 | 264702_at      | mitochondrion                  | 19                           |                            |
| AT2G03130                   | RPL12              | protein coding            | prok      | Large   | CATMA2A02040 | 266729_at      | unclear                        |                              |                            |
| AT3G06040                   | RPL12              | protein coding            | prok      | Large   | CATMA3A05100 | 258466_at      | unclear                        |                              |                            |
| AT4G36420                   | RPL12              | protein coding            | prok      | Large   | CATMA4A38000 | 246210_at      | mitochondrion                  |                              |                            |
| AT4G37660                   | RPL12              | protein coding            | prok      | Large   | CATMA4A39180 | 253058_at      | mitochondrion                  |                              |                            |
| AT2G37190                   | RPL12A             | protein coding            | euk       | Large   |              | 265445_at      | cytosol                        | 3, 11, 4                     |                            |
| AT3G27830                   | RPL12A             | protein coding            | prok      | Large   |              |                | plastid                        | 4, 9, 27, 13, 2, 14          |                            |
| AT3G27840                   | RPL12B             | protein coding            | prok      | Large   | CATMA3A27650 | 257223_at      | plastid                        |                              |                            |
| AT3G53430                   | RPL12B             | protein coding            | euk       | Large   | CATMA3A46380 | 251938_at      | cytosol                        | 4                            |                            |
| AT3G27850                   | RPL12C             | protein coding            | prok      | Large   |              | 257225_s_at    | plastid                        | 27, 13, 2, 14, 1             |                            |
| AT5G06670                   | RPL12C             | protein coding            | euk       | Large   | CATMA5A56410 | 247584_at      | cytosol                        | 4                            |                            |
| AT3G01790                   | RPL13              | protein coding            | prok      | Large   | CATMA3A00900 | 258995_at      | mitochondrion                  |                              |                            |
| AT3G48130                   | RPL13 homolog/RSU1 | pseudogene                |           | Large   | CATMA3A41135 | 252347_at      | unclear                        |                              |                            |
| AT3G49010                   | RPL13B             | protein coding            | euk       | Large   |              | 252294_at      | cytosol                        | 3, 8, 4, 7, 5                | 3                          |
| AT1G78630                   | RPL13A             | protein coding            | prok      | Large   | CATMA1A67690 | 263131_at      | plastid                        | 9, 6, 2, 1                   |                            |
| AT3G48960                   | RPL13C             | protein coding            | euk       | Large   | CATMA3A41940 | 252283_at      | cytosol                        | 23                           |                            |
| AT5G23900                   | RPL13D             | protein coding            | euk       | Large   | CATMA5A21370 | 249815_at      | cytosol                        | 4, 23                        |                            |
| AT3G07110                   | RPL13aA            | protein coding            | euk       | Large   |              | 258837_at      | cytosol                        | 3, 2                         | 3                          |
| AT3G24830                   | RPL13aB            | protein coding            | euk       | Large   | CATMA3A24750 | 257599_at      | cytosol                        | 5                            |                            |
| AT4G13170                   | RPL13aC            | protein coding            | euk       | Large   | CATMA4A13270 | 254763_at      | cytosol                        |                              |                            |
| AT5G48760                   | RPL13aD            | protein coding            | euk       | Large   |              | 248655_at      | cytosol                        |                              |                            |
| AT1G17560                   | RPL14 HLL          | protein coding            | prok      | Large   | CATMA1A16610 | 260683_at      | mitochondrion                  | 15                           |                            |
| ATCG00780                   | RPL14 HLL          | protein coding            | prok      | Large   | C165         | 244982_at      | plastid                        | 9                            |                            |
| AT5G46160                   | RPL14 HLP          | protein coding            | prok      | Large   | CATMA5A42160 | 248878_at      | mitochondrion                  |                              | 15                         |
| AT2G20450                   | RPL14A             | protein coding            | euk       | Large   | CATMA2A18940 | 263372_at      | cytosol                        | 17, 4, 18                    |                            |
| AT4G27090                   | RPL14B             | protein coding            | euk       | Large   |              | 253901_at      | cytosol                        | 17, 3, 4, 2, 7, 18, 5        |                            |
| AT4G23620                   | RPL15              | protein coding            | prok      | Large   | CATMA4A25470 | 254228_at      | mitochondrion                  |                              |                            |
| AT5G46470                   | RPL15              | protein coding            | prok      | Large   | CATMA5A60100 | 247249_at      | mitochondrion                  |                              |                            |
| AT3G25920                   | RPL15              | protein coding            | prok      | Large   | CATMA3A25740 | 258076_at      | plastid                        | 9, 6, 2                      |                            |
| AT4G16720                   | RPL15A             | protein coding            | euk       | Large   |              | 245342_at      | cytosol                        | 8, 7, 5                      |                            |
| AT4G17390                   | RPL15B             | protein coding            | euk       | Large   |              | 245355_at      | cytosol                        | 3                            |                            |
| ATCG00790                   | RPL16              | protein coding            | prok      | Large   | C168         | 244983_at      | plastid                        | 9                            |                            |
| ATMG00080                   | RPL16              | protein coding            | prok      | Large   | M015         |                | mitochondrion                  |                              |                            |
| AT2G42740                   | RPL16A RPL11A?     | protein coding            | euk       | Large   | CATMA2A41170 | 263973_at      | cytosol                        | 3, 4, 2, 18                  |                            |
| AT4G18730                   | RPL16B RPL11C?     | protein coding            | euk       | Large   | CATMA4A19855 | 254617_s_at    | cytosol                        | 18                           |                            |
| AT3G54210                   | RPL17              | protein coding            | prok      | Large   | CATMA3A47150 | 251883_at      | plastid                        | 9                            |                            |
| AT5G4650                    | RPL17              | protein coding            | prok      | Large   | CATMA5A60080 | 247247_at      | mitochondrion                  |                              |                            |
| AT1G27400                   | RPL17A             | protein coding            | euk       | Large   | CATMA1A25610 | 264438_at      | cytosol                        | 8, 4, 2, 7, 18               |                            |
| AT1G67430                   | RPL17B             | protein coding            | euk       | Large   | CATMA1A56750 | 264233_at      | cytosol                        | 3, 4, 18                     |                            |
| AT5G09770                   | RPL17family        | protein coding            | prok      | Large   | CATMA5A08580 | 250495_at      | mitochondrion                  |                              |                            |
| AT3G05590                   | RPL18B             | protein coding            | euk       | Large   | CATMA3A04615 | 258900_at      | cytosol                        | 22, 8, 4, 2, 7, 18           |                            |
| AT2G47570                   | RPL18A             | protein coding            | euk       | Large   | CATMA2A46030 | 245170_at      | unclear                        |                              |                            |
| AT5G27850                   | RPL18C             | protein coding            | euk       | Large   | CATMA5A25280 | 246758_at      | cytosol                        | 4, 18                        |                            |
| AT3G20230                   | RPL18N             | protein coding            | prok      | Large   | CATMA3A19890 | 257132_at      | plastid                        |                              |                            |
| AT3G22450                   | RPL18N             | protein coding            | prok      | Large   | CATMA3A22450 | 258447_at      | mitochondrion                  |                              |                            |
| AT2G28830                   | RPL18N             | protein coding            | prok      | Large   |              | 266230_at      | unclear                        |                              |                            |
| AT5G27820                   | RPL18N             | protein coding            | prok      | Large   | CATMA5A25250 | 246746_at      | unclear                        |                              |                            |
| AT3G45020                   | RPL18N             | protein coding            | prok      | Large   | CATMA3A38040 |                | mitochondrion                  |                              |                            |
| AT1G14205                   | RPL18N             | protein coding            | prok      | Large   |              |                | unclear                        |                              |                            |
| AT1G08845                   | RPL18N             | protein coding            | prok      | Large   | CATMA1A07750 |                | mitochondrion                  |                              |                            |
| AT3G17626                   | RPL18N             | protein coding            | prok      | Large   |              |                | unclear                        |                              |                            |
| AT5G13720                   | RPL18N             | protein coding            | prok      | Large   |              | 250247_at      | plastid                        | 9, 33                        |                            |
| AT1G48350                   | RPL18N             | protein coding            | prok      | Large   | CATMA1A39430 | 262235_at      | plastid                        | 9, 1                         |                            |
| AT1G29965                   | RPL18aA            | protein coding            | euk       | Large   | CATMA1A27980 |                | cytosol                        |                              |                            |
| AT1G29970                   | RPL18aA            | protein coding            | euk       | Large   | CATMA1A27990 | 260026_at      | cytosol                        |                              |                            |
| AT2G34480                   | RPL18aB            | protein coding            | euk       | Large   | CATMA2A32620 | 267007_at      | cytosol                        | 8, 7, 5                      |                            |
| AT3G14600                   | RPL18aC            | protein coding            | euk       | Large   | CATMA3A13920 | 258090_at      | cytosol                        | 5                            |                            |
| AT1G24240                   | RPL19              | protein coding            | prok      | Large   | CATMA1A23130 | 264874_at      | mitochondrion                  |                              |                            |
| AT4G11630                   | RPL19              | protein coding            | prok      | Large   |              |                | mitochondrion                  |                              |                            |
| AT5G11750                   | RPL19              | protein coding            | prok      | Large   |              |                | unclear                        |                              |                            |
| AT4G17560                   | RPL19              | protein coding            | prok      | Large   | CATMA4A18580 | 245357_at      | plastid                        | 9, 1                         |                            |
| AT5G47190                   | RPL19              | protein coding            | prok      | Large   | CATMA5A43180 | 248798_at      | plastid                        | 9, 1                         |                            |
| AT1G02780                   | RPL19A             | protein coding            | euk       | Large   | CATMA1A01720 | 262117_at      | cytosol                        | 3, 8, 4, 5                   |                            |
| AT3G16780                   | RPL19B             | protein coding            | euk       | Large   |              | 258410_at      | cytosol                        | 8                            |                            |
| AT4G02230                   | RPL19C             | protein coding            | euk       | Large   | CATMA4A02500 | 255520_at      | cytosol                        | 8, 5                         |                            |
| AT4G16030                   | RPL19D             | protein coding            | euk       | Large   | CATMA4A16813 | 245471_at      | mitochondrion                  |                              |                            |
| AT2G07715                   | RPL2               | protein coding            | prok      | Large   | CATMA2A07160 |                | mitochondrion                  |                              |                            |
| AT2G44065                   | RPL2               | protein coding            | prok      | Large   | CATMA2A42495 | 267211_at      | mitochondrion                  |                              |                            |
| ATMG00560                   | RPL2               | protein coding            | prok      | Large   | M164         | 265232_s_at    | mitochondrion                  |                              |                            |
| ATMG00690                   | RPL2               | protein coding            | prok      | Large   | M273         | 244906_at      | mitochondrion                  |                              |                            |
| AT4G14250                   | RPL2               | protein coding            | prok      | Large   | CATMA4A14540 |                | unclear                        |                              |                            |
| ATCG00830                   | RPL2.1             | protein coding            | prok      | Large   | C175         |                | plastid                        | 9                            |                            |
| ATCG01310                   | RPL2.2             | protein coding            | prok      | Large   |              | 244987_s_at    | plastid                        |                              |                            |
| AT1G16740                   | RPL20              | protein coding            | prok      | Large   |              | 255767_at      | mitochondrion                  |                              |                            |

|           |             |                |         |       |              |             |               |                      |    |
|-----------|-------------|----------------|---------|-------|--------------|-------------|---------------|----------------------|----|
| ATCG00660 | RPL20       | protein coding | prok    | Large | C139         | 244970_at   | plastid       | 9                    |    |
| AT1G57860 | RPL21G      | protein coding | euk     | Large |              | 246379_s_at | mitochondrion |                      |    |
| AT1G35680 | RPL21/CL21  | protein coding | prok    | Large | CATMA1A33866 | 262029_at   | plastid       | 11, 9, 6, 2, 1       |    |
| AT4G30930 | RPL21/NFD1  | protein coding | prok    | Large | CATMA4A32590 | 253549_at   | mitochondrion |                      | 29 |
| AT1G09590 | RPL21A      | protein coding | euk     | Large |              |             | cytosol       | 3, 4, 2              | 3  |
| AT1G09486 | RPL21B      | pseudogene     |         | Large |              |             | unclear       |                      |    |
| AT1G09690 | RPL21C      | protein coding | euk     | Large | CATMA1A08550 | 246479_s_at | mitochondrion |                      |    |
| AT1G31355 | RPL21D      | pseudogene     |         | Large |              |             | unclear       |                      |    |
| AT1G57660 | RPL21E      | protein coding | euk     | Large |              |             | unclear       |                      |    |
| AT3G57820 | RPL21F      | pseudogene     |         | Large |              | 251604_at   | unclear       |                      |    |
| AT1G52370 | RPL22       | protein coding | prok    | Large | CATMA1A43430 |             | mitochondrion |                      |    |
| AT4G28360 | RPL22       | protein coding | prok    | Large | CATMA4A30000 | 253773_s_at | mitochondrion | 31                   |    |
| ATCG00810 | RPL22       | protein coding | prok    | Large |              | 244985_at   | plastid       | 9                    |    |
| AT1G02830 | RPL22A      | protein coding | euk     | Large | CATMA1A01760 | 262132_at   | cytosol       |                      |    |
| AT3G05560 | RPL22B      | protein coding | euk     | Large | CATMA3A04590 | 259112_at   | cytosol       | 3, 8, 4, 5           |    |
| AT5G27770 | RPL22C      | protein coding | euk     | Large | CATMA5A25180 | 246745_at   | cytosol       | 3, 8, 4              |    |
| AT1G04480 | RPL23A      | protein coding | euk     | Large |              | 263665_at   | mitochondrion |                      |    |
| ATCG00840 | RPL23.1     | protein coding | prok    | Large |              |             | plastid       | 9                    |    |
| ATCG01300 | RPL23.2     | protein coding | prok    | Large |              | 244988_s_at | plastid       |                      |    |
| AT3G04400 | RPL23C      | protein coding | euk     | Large | CATMA3A03370 | 258569_at   | mitochondrion |                      |    |
| AT4G39880 | RPL23?      | protein coding | prok    | Large | CATMA4A41270 | 252850_at   | mitochondrion |                      |    |
| AT2G33370 | RPL23B      | protein coding | euk     | Large | CATMA2A31530 | 255789_at   | cytosol       | 3, 4                 |    |
| AT2G39460 | RPL23aA     | protein coding | euk     | Large | CATMA2A37735 | 266981_at   | cytosol       | 3, 4                 |    |
| AT3G55280 | RPL23aB     | protein coding | euk     | Large | CATMA3A48290 | 251783_at   | cytosol       | 5                    |    |
| AT5G23535 | RPL24       | protein coding | prok    | Large | CATMA5A21050 |             | unclear       |                      |    |
| AT5G54600 | RPL24       | protein coding | prok    | Large | CATMA5A05455 | 248174_at   | plastid       | 9                    |    |
| AT2G44860 | RPL24C      | protein coding | euk     | Large | CATMA2A43320 | 266822_at   | nucleus       |                      | 3  |
| AT2G36620 | RPL24A      | protein coding | euk     | Large | CATMA2A34850 | 265210_at   | cytosol       | 8, 4, 2              |    |
| AT3G53020 | RPL24B      | protein coding | euk     | Large | CATMA3A45970 | 251997_at   | cytosol       | 3                    |    |
| AT5G66860 | RPL25       | protein coding | prok    | Large | CATMA5A62290 |             | mitochondrion | 19                   |    |
| AT3G49910 | RPL26A      | protein coding | euk     | Large |              | 252235_at   | cytosol       | 3, 11, 8, 4, 2, 7, 5 | 3  |
| AT5G67510 | RPL26B      | protein coding | euk     | Large |              | 247010_at   | unclear       |                      |    |
| AT2G16930 | RPL27       | protein coding | prok    | Large |              | 266535_s_at | mitochondrion |                      |    |
| AT5G15220 | RPL27       | protein coding | prok    | Large |              |             | mitochondrion |                      |    |
| AT5G40950 | RPL27       | protein coding | prok    | Large | CATMA5A36620 | 249331_at   | plastid       | 9, 6, 2, 14, 15      |    |
| AT5G39800 | RPL27       | protein coding |         | Large |              | 249424_s_at | mitochondrion |                      |    |
| AT2G32220 | RPL27A      | protein coding | euk     | Large | CATMA2A30500 | 265730_at   | unclear       |                      |    |
| AT3G22230 | RPL27B      | protein coding | euk     | Large |              | 256794_at   | cytosol       | 4, 5                 |    |
| AT4G15000 | RPL27C      | protein coding | euk     | Large | CATMA4A15480 | 245372_at   | cytosol       | 4                    |    |
| AT1G12960 | RPL27aA     | protein coding | euk     | Large |              | 261200_at   | unclear       |                      |    |
| AT1G23290 | RPL27aB     | protein coding | euk     | Large |              | 262985_s_at | cytosol       | 3, 3                 |    |
| AT1G70600 | RPL27aC     | protein coding | euk     | Large | CATMA1A59875 |             | cytosol       | 4, 5                 |    |
| AT2G33450 | RPL28       | protein coding | prok    | Large | CATMA2A31610 | 255850_at   | plastid       | 9,                   |    |
| AT1G04457 | RPL28       | pseudogene     |         | Large |              |             | unclear       |                      |    |
| AT4G31460 | RPL28       | protein coding | prok    | Large | CATMA4A33116 | 253538_at   | unclear       |                      |    |
| AT2G19730 | RPL28A      | protein coding | euk     | Large | CATMA2A18270 | 266699_at   | cytosol       | 8, 4                 |    |
| AT4G29410 | RPL28C      | protein coding | euk     | Large | CATMA4A31040 | 253728_at   | cytosol       | 8                    |    |
| AT1G07830 | RPL29       | protein coding | prok    | Large | CATMA1A06860 | 261418_at   | mitochondrion |                      |    |
| AT5G65220 | RPL29       | protein coding | prok    | Large | CATMA5A60610 | 247201_at   | plastid       | 9, 2, 1              |    |
| AT3G06700 | RPL29A      | protein coding | euk     | Large |              | 258532_at   | cytosol       | 3                    |    |
| AT3G06680 | RPL29B      | protein coding | euk     | Large |              | 258521_at   | cytosol       |                      |    |
| AT3G17465 | RPL3/ RPL3P | protein coding |         | Large | CATMA3A16900 | 258404_at   | mitochondrion | 19                   |    |
| AT5G55140 | RPL30       | protein coding | prok    | Large | CATMA5A50910 | 248102_at   | mitochondrion |                      |    |
| AT1G36240 | RPL30A      | protein coding | euk     | Large | CATMA1A34350 | 256460_at   | cytosol       |                      |    |
| AT1G77940 | RPL30B      | protein coding | euk     | Large | CATMA1A67090 | 262163_at   | cytosol       |                      |    |
| AT3G18740 | RPL30C      | protein coding | euk     | Large | CATMA3A18350 | 257753_at   | cytosol       | 5                    |    |
| AT1G75350 | RPL31       | protein coding | prok    | Large | CATMA1A64680 | 261119_at   | plastid       | 9, 6, 1              |    |
| AT2G19740 | RPL31A      | protein coding | euk     | Large | CATMA2A18280 | 266700_at   | cytosol       | 8                    |    |
| AT4G26230 | RPL31B      | protein coding | euk     | Large |              | 254012_at   | cytosol       |                      |    |
| AT5G56710 | RPL31C      | protein coding | euk     | Large | CATMA5A52490 | 247978_at   | cytosol       | 5                    |    |
| ATCG01020 | RPL32       | protein coding | prok    | Large |              | C207        | 244960_at     | plastid              |    |
| AT4G18100 | RPL32A      | protein coding | euk     | Large | CATMA4A19120 | 254655_s_at | cytosol       | 3, 4, 5              |    |
| AT5G46430 | RPL32B      | protein coding | euk     | Large |              |             | cytosol       | 4                    |    |
| AT3G06320 | RPL33       | protein coding |         | Large | CATMA3A05400 |             | unclear       |                      |    |
| AT5G18790 | RPL33       | protein coding |         | Large |              | 249975_s_at | unclear       |                      |    |
| ATCG00640 | RPL33       | protein coding | prok    | Large |              | C135        | 244968_at     | plastid              | 9  |
| AT1G29070 | RPL34       | protein coding | prok    | Large | CATMA1A27050 | 260898_at   | plastid       |                      |    |
| AT1G69620 | RPL34B      | protein coding | euk     | Large |              | 260369_at   | cytosol       | 4, 7                 |    |
| AT3G13882 | RPL34       | protein coding | prok    | Large | CATMA3A13110 |             | unclear       |                      |    |
| AT1G26880 | RPL34A      | protein coding | euk     | Large | CATMA1A25090 | 263691_at   | cytosol       | 3, 2                 | 3  |
| AT3G28900 | RPL34C      | protein coding | euk     | Large |              | 257141_at   | cytosol       | 5                    |    |
| AT1G06980 | RPL35aA?    | protein coding | euk     | Large | CATMA1A06040 | 256066_at   | cytosol       | 5                    |    |
| AT1G07070 | RPL35aA     | protein coding | euk     | Large | CATMA1A06140 | 256065_at   | mitochondrion |                      |    |
| AT1G41880 | RPL35aB     | protein coding | euk     | Large |              | 261362_s_at | unclear       | 4                    |    |
| AT1G42740 | RPL35aC     | protein coding | euk     | Large | CATMA1A63670 | 260258_at   | cytosol       | 4                    |    |
| AT3G55750 | RPL35aD     | protein coding | euk     | Large |              |             | mitochondrion |                      |    |
| AT3G09500 | RPL35A      | protein coding | euk     | Large | CATMA3A08360 | 258709_at   | cytosol       | 3, 4                 |    |
| AT2G39390 | RPL35B      | protein coding | euk     | Large |              | 266980_at   | cytosol       |                      |    |
| AT3G55170 | RPL35C      | protein coding | euk     | Large |              | 251834_at   | cytosol       |                      |    |
| AT5G02610 | RPL35D      | protein coding | euk     | Large | CATMA5A01700 | 251007_at   | cytosol       | 7                    |    |
| AT2G24090 | RPL35family | protein coding | prok    | Large | CATMA2A22440 | 266570_at   | plastid       | 9                    |    |
| AT5G20180 | RPL36       | protein coding | prok    | Large | CATMA5A18620 | 246073_at   | unclear       |                      |    |
| ATCG00760 | RPL36       | protein coding | prok    | Large |              | C162        | 244980_at     | plastid              | 9  |
| AT2G37600 | RPL36A      | protein coding | euk     | Large | CATMA2A35880 | 267174_at   | cytosol       | 4                    |    |
| AT3G53740 | RPL36B      | protein coding | euk     | Large | CATMA3A46690 | 251926_at   | cytosol       | 7                    |    |
| AT5G02450 | RPL36C      | protein coding | euk     | Large | CATMA5A01530 | 251018_at   | cytosol       | 4, 7                 |    |
| AT3G23390 | RPL36aA     | protein coding | euk     | Large | CATMA3A23320 | 258296_at   | cytosol       |                      |    |
| AT4G14320 | RPL36aB     | protein coding | euk     | Large | CATMA4A14640 | 245311_at   | cytosol       |                      |    |
| AT3G10950 | RPL37aB     | protein coding | euk     | Large | CATMA3A10000 | 256434_at   | cytosol       |                      |    |
| AT3G60245 | RPL37aC     | protein coding | euk     | Large | CATMA3A53270 | 251409_at   | cytosol       |                      |    |
| AT1G15250 | RPL37A      | protein coding | euk     | Large |              | 262594_at   | unclear       |                      |    |
| AT2G35180 | RPL37e      | pseudogene     |         | Large |              |             | unclear       |                      |    |
| AT1G52300 | RPL37B      | protein coding | euk     | Large | CATMA1A43350 | 259612_at   | unclear       |                      |    |
| AT3G16080 | RPL37C      | protein coding | euk     | Large | CATMA3A15500 | 258284_at   | unclear       |                      |    |
| AT2G43460 | RPL38A      | protein coding | euk     | Large | CATMA2B41860 | 260538_at   | cytosol       |                      |    |
| AT3G59540 | RPL38B      | protein coding | euk     | Large |              | 251486_at   | cytosol       |                      |    |
| AT2G25210 | RPL39A      | protein coding | euk     | Large |              | 263585_at   | unclear       |                      |    |
| AT3G02190 | RPL39B      | protein coding | euk     | Large | CATMA3A01183 | 259130_at   | unclear       |                      |    |
| AT4G31981 | RPL39e      | protein coding |         | Large |              |             | unclear       |                      |    |
| AT4G31985 | RPL39C      | protein coding | euk     | Large |              | 253482_at   | unclear       |                      |    |
| AT1G43170 | RPL3A       | protein coding | euk     | Large | CATMA1A36595 | 264421_at   | cytosol       | 3, 8, 7, 18, 5       | 3  |
| AT1G61580 | RPL3B       | protein coding | euk     | Large | CATMA1A50680 | 265032_at   | cytosol       |                      |    |
| AT5G42445 | RPL3C       | pseudogene     | unclear | Large | CATMA5A38210 |             | unclear       |                      |    |

|           |                         |                |         |       |              |             |               |                         |    |
|-----------|-------------------------|----------------|---------|-------|--------------|-------------|---------------|-------------------------|----|
| AT1G58010 | RPL3                    | pseudogene     | unclear | Large |              |             | unclear       | 9, 6, 2                 |    |
| AT2G43030 | RPL3related             | protein coding | prok    | Large | CATMA2A41430 | 265247_at   | plastid       |                         |    |
| AT1G07320 | RPL4                    | protein coding | prok    | Large | CATMA1A06385 | 261078_at   | plastid       | 11, 9, 6, 13, 2, 14, 15 |    |
| AT3G09630 | RPL4A                   | protein coding | euk     | Large | CATMA3A08490 | 258715_at   | cytosol       | 3, 8, 4, 2, 18, 5       |    |
| AT1G35200 | RPL4B                   | pseudogene     | unclear | Large |              | 245782_at   | unclear       |                         |    |
| AT2G24730 | RPL4C                   | pseudogene     | unclear | Large | CATMA2B23070 |             | unclear       |                         |    |
| AT5G02870 | RPL4D                   | protein coding | euk     | Large | CATMA5A01950 | 250973_at   | cytosol       | 3, 8, 4, 2, 7, 18, 5    | 3  |
| AT2G20060 | RPL4                    | protein coding | prok    | Large | CATMA2A18540 | 265594_at   | mitochondrion |                         |    |
| AT3G52590 | RPL40B                  | protein coding | euk     | Large |              | 252056_at   | cytosol       |                         |    |
| AT2G36170 | RPL40A                  | protein coding | euk     | Large |              | 263289_at   | cytosol       | 3                       |    |
| AT5G40080 | RPL41                   | protein coding | prok    | Large |              |             | mitochondrion |                         |    |
| AT2G40205 | RPL41C                  | protein coding | euk     | Large |              |             | unclear       |                         |    |
| AT3G08520 | RPL41D                  | protein coding | euk     | Large |              |             | unclear       |                         |    |
| AT3G11120 | RPL41E                  | protein coding | euk     | Large |              | 256438_s_at | unclear       |                         |    |
| AT3G56020 | RPL41G                  | protein coding | euk     | Large |              |             | unclear       |                         |    |
| AT2G07725 | RPL5                    | protein coding | prok    | Large |              |             | unclear       |                         |    |
| ATMG00210 | RPL5                    | protein coding | prok    | Large | M067         | 266044_s_at | mitochondrion |                         |    |
| AT4G01310 | RPL5 family             | protein coding | prok    | Large | CATMA4A01510 | 255623_at   | plastid       | 9, 6, 2, 1              |    |
| AT3G59650 | RPL51/S25               | protein coding |         | Large | CATMA3A52680 | 251483_at   | mitochondrion |                         |    |
| AT3G25520 | RPL5A                   | protein coding | euk     | Large |              | 257906_at   | cytosol       | 22, 8, 4, 2, 18, 5      | 30 |
| AT5G39740 | RPL5B                   | protein coding | euk     | Large |              | 249466_at   | cytosol       | 3, 8, 4                 |    |
| AT5G40130 | RPL5C                   | pseudogene     |         | Large |              | 249390_at   | unclear       |                         |    |
| AT2G18400 | RPL6                    | protein coding | prok    | Large |              | 265338_at   | unclear       |                         |    |
| AT1G05190 | RPL6 /emb2394           | protein coding | prok    | Large | CATMA1A04040 | 264575_at   | plastid       | 9, 6, 2, 1              |    |
| AT1G18540 | RPL6A                   | protein coding | euk     | Large |              | 255776_at   | cytosol       | 17, 8, 2                |    |
| AT1G74060 | RPL6B                   | protein coding | euk     | Large |              | 260383_s_at | nucleus       | 3                       |    |
| AT1G74050 | RPL6C                   | protein coding | euk     | Large |              |             | cytosol       | 8                       |    |
| AT4G12600 | RPL7Ae/L30e/S12e/Gadd45 | protein coding |         | Large | CATMA4A12760 | 254831_at   | cytosol       |                         |    |
| AT4G22380 | RPL7Ae/L30e/S12e/Gadd45 | protein coding |         | Large |              | 254355_at   | unclear       | 3                       |    |
| AT5G08180 | RPL7Ae/L30e/S12e/Gadd45 | protein coding |         | Large | CATMA4A05770 | 250546_at   | nucleus       | 3                       | 3  |
| AT5G20160 | RPL7Ae/L30e/S12e/Gadd45 | protein coding |         | Large | CATMA5A18600 | 246070_at   | nucleus       | 3                       | 3  |
| AT2G47610 | RPL7aA                  | protein coding | euk     | Large | CATMA2A46040 | 245121_at   | cytosol       | 3, 2, 7, 5              | 3  |
| AT3G62870 | RPL7aB                  | protein coding | euk     | Large | CATMA3A56030 | 251185_at   | cytosol       | 7                       |    |
| AT1G80750 | RPL7A                   | protein coding | euk     | Large | CATMA1A69960 | 261911_at   | nucleus       | 3, 22                   |    |
| AT2G01250 | RPL7B                   | protein coding | euk     | Large | CATMA2A00310 | 265736_at   | cytosol       | 8, 2, 7, 18             |    |
| AT2G44120 | RPL7C                   | protein coding | euk     | Large | CATMA2A42540 | 267213_at   | cytosol       | 3, 2, 18                | 3  |
| AT3G13580 | RPL7D                   | protein coding | euk     | Large | CATMA3A12730 | 256648_at   | cytosol       | 2, 5, 24, 25            |    |
| AT4G36130 | RPL8C                   | protein coding | euk     | Large | CATMA4A37790 |             | cytosol       | 8, 18, 5                |    |
| AT3G51190 | RPL8B                   | protein coding | euk     | Large | CATMA3A44190 | 252144_at   | cytosol       | 5                       |    |
| AT2G18020 | RPL8A                   | protein coding | euk     | Large |              | 265805_s_at | cytosol       | 3, 8, 2, 7, 18, 5       |    |
| AT5G53070 | RPL9                    | protein coding | prok    | Large | CATMA5A48970 | 248295_at   | mitochondrion |                         |    |
| AT3G44890 | RPL9/CL9                | protein coding | prok    | Large | CATMA3A37910 | 246339_at   | plastid       | 9, 6, 2                 |    |
| AT1G33140 | RPL9C                   | protein coding | euk     | Large |              |             | cytosol       | 1, 18                   |    |
| AT1G33120 | RPL9B                   | protein coding | euk     | Large |              | 261620_s_at | cytosol       | 3, 8, 2, 7, 18          | 3  |
| AT4G10450 | RPL9D                   | protein coding | euk     | Large | CATMA4A10490 | 254980_at   | cytosol       | 5                       |    |
| AT2G40010 | RPP0A                   | protein coding | euk     | Small | CATMA2B38240 | 267349_at   | cytosol       |                         |    |
| AT3G09200 | RPP0B                   | protein coding | euk     | Small | CATMA3A08070 | 259006_at   | cytosol       | 3, 11, 8, 4, 2, 10, 5   |    |
| AT3G11250 | RPP0C                   | protein coding | euk     | Small | CATMA3A10270 | 256253_at   | cytosol       | 4, 10, 5                |    |
| AT1G25260 | RPP0D                   | protein coding | euk     | Small | CATMA1A23910 | 245639_at   | cytosol       |                         |    |
| AT1G01100 | RPP1A                   | protein coding | euk     | Small | CATMA1A00080 | 261578_at   | cytosol       | 8, 10                   |    |
| AT4G00810 | RPP1B                   | protein coding | euk     | Small | CATMA4A00880 | 255657_at   | cytosol       |                         |    |
| AT5G47700 | RPP1C                   | protein coding | euk     | Small | CATMA5A43680 | 248768_at   | cytosol       | 8                       |    |
| AT5G24510 | RPP1D                   | protein coding | euk     | Small | CATMA5A22110 | 249738_at   | cytosol       |                         |    |
| AT3G49460 | RPP1D                   | protein coding | euk     | Small |              | 252259_at   | cytosol       |                         |    |
| AT2G27720 | RPP2A                   | protein coding | euk     | Small |              | 266258_at   | cytosol       | 11, 5                   |    |
| AT2G27710 | RPP2B                   | protein coding | euk     | Small |              | 266256_at   | cytosol       | 3, 11, 8, 5             |    |
| AT3G28500 | RPP2C                   | protein coding | euk     | Small | CATMA3A28390 | 265597_at   | cytosol       | 8, 5                    |    |
| AT3G44590 | RPP2D                   | protein coding | euk     | Small | CATMA3A37500 | 252643_at   | cytosol       |                         |    |
| AT5G40040 | RPP2E                   | protein coding | euk     | Small |              | 249381_at   | cytosol       |                         |    |
| AT4G25890 | RPP3A                   | protein coding | euk     | Small | CATMA4A27590 | 254030_at   | cytosol       | 8, 5                    | 26 |
| AT5G57290 | RPP3B                   | protein coding | euk     | Small |              | 247900_at   | cytosol       | 23                      |    |
| AT1G71720 | RPS1                    | protein coding | prok    | Small | CATMA1A60920 | 261507_at   | plastid       |                         |    |
| AT5G30510 | RPS1                    | protein coding | prok    | Small | CATMA5A27970 |             | plastid       | 9, 27, 2                |    |
| AT3G23700 | RPS1                    | protein coding | prok    | Small | CATMA3A23650 | 257172_at   | plastid       | 11, 9, 2                |    |
| AT3G13120 | RPS10                   | protein coding | prok    | Small | CATMA3A12140 | 257190_at   | plastid       | 9                       |    |
| AT3G22300 | RPS10                   | protein coding | prok    | Small | CATMA3A22295 | 258454_at   | mitochondrion |                         |    |
| AT4G25740 | RPS10A                  | protein coding | euk     | Small | CATMA4A27430 | 254049_at   | cytosol       | 4                       |    |
| AT5G41520 | RPS10B                  | protein coding | euk     | Small | CATMA5A37120 | 249310_at   | cytosol       | 5                       |    |
| AT5G52650 | RPS10C                  | protein coding | euk     | Small | CATMA5A48520 | 248331_at   | cytosol       | 5                       |    |
| ATCG00750 | RPS11                   | protein coding | prok    | Small |              | 244979_at   | plastid       | 9                       |    |
| AT5G23740 | RPS11C                  | protein coding | euk     | Small | CATMA5A21225 | 249795_at   | cytosol       | 4                       | 12 |
| AT2G24110 | RPS11                   | pseudogene     | euk     | Small | CATMA2A22460 |             | unclear       |                         |    |
| AT1G31817 | RPS11/NFD3              | protein coding | prok    | Small | CATMA1A30070 | 246266_at   | mitochondrion |                         |    |
| AT4G30800 | RPS11B                  | protein coding | euk     | Small | CATMA4A32410 | 253598_at   | cytosol       |                         |    |
| AT3G48930 | RPS11A                  | protein coding | euk     | Small | CATMA3A41910 | 252297_at   | cytosol       | 4                       | 26 |
| AT2G07679 | RPS12                   | protein coding | prok    | Small |              |             | mitochondrion |                         |    |
| AT2G07675 | RPS12                   | protein coding | prok    | Small | CATMA2A06470 |             | mitochondrion |                         |    |
| ATCG00160 | RPS12                   | protein coding | prok    | Small | C033         | 244996_at   | plastid       | 9                       |    |
| ATCG00905 | RPS12                   | protein coding | prok    | Small | C193         |             | plastid       |                         |    |
| ATCG01230 | RPS12                   | protein coding | prok    | Small |              | 244940_at   | plastid       |                         |    |
| AT1G15930 | RPS12A                  | protein coding | euk     | Small | CATMA1A14990 | 261789_at   | cytosol       | 4, 5                    |    |
| AT1G80800 | RPS12B                  | pseudogene     | euk     | Small |              |             | unclear       |                         |    |
| AT2G32060 | RPS12C                  | protein coding | euk     | Small | CATMA2A30340 | 265671_at   | cytosol       | 11, 5                   |    |
| AT1G77750 | RPS13                   | protein coding | prok    | Small | CATMA1A66900 | 259678_at   | mitochondrion |                         | 20 |
| AT5G14320 | RPS13                   | protein coding | prok    | Small | CATMA5A12555 | 250190_at   | plastid       | 9, 2, 1                 | 20 |
| AT3G60770 | RPS13A                  | protein coding | euk     | Small | CATMA3A53760 | 251341_at   | cytosol       | 3, 4, 2                 | 3  |
| AT4G00100 | RPS13B                  | protein coding | euk     | Small | CATMA4A00105 | 255706_at   | cytosol       | 3, 4                    |    |
| AT2G34520 | RPS14                   | protein coding | prok    | Small | CATMA2A32660 | 266955_at   | mitochondrion |                         |    |
| AT3G52580 | RPS14C                  | protein coding | euk     | Small | CATMA3A45520 | 252055_at   | cytosol       |                         |    |
| ATCG00330 | RPS14                   | protein coding | prok    | Small | C071         | 245005_at   | plastid       | 9                       |    |
| AT2G36160 | RPS14A                  | protein coding | euk     | Small | CATMA2A34350 | 263286_at   | cytosol       | 8, 4, 2, 7, 5           |    |
| AT3G11510 | RPS14B                  | protein coding | euk     | Small | CATMA3A10470 | 259239_at   | cytosol       | 3, 4, 5                 |    |
| ATCG01120 | RPS15                   | protein coding | prok    | Small | C230         | 244938_at   | plastid       | 9, 6                    |    |
| AT1G15810 | RPS15?                  | protein coding | prok    | Small |              | 259505_at   | mitochondrion |                         |    |
| AT1G80620 | RPS15?                  | protein coding | prok    | Small | CATMA1A69830 |             | mitochondrion |                         |    |
| AT1G04270 | RPS15A                  | protein coding | euk     | Small | CATMA1A03115 | 263667_at   | cytosol       | 8, 7, 5                 |    |
| AT5G09490 | RPS15B                  | protein coding | euk     | Small |              | 245890_at   | cytosol       |                         |    |
| AT5G09500 | RPS15C                  | protein coding | euk     | Small |              | 245883_at   | cytosol       |                         |    |
| AT5G09510 | RPS15D                  | protein coding | euk     | Small | CATMA5A08340 | 245886_at   | cytosol       | 3, 7, 5                 |    |
| AT5G43640 | RPS15E                  | protein coding | euk     | Small |              | 249105_at   | cytosol       |                         |    |
| AT5G63070 | RPS15F                  | protein coding | euk     | Small | CATMA5A58620 | 247416_at   | cytosol       |                         |    |
| AT1G33850 | RPS15G                  | protein coding | euk     | Small |              | 261995_at   | cytosol       |                         |    |
| AT1G07770 | RPS15AA                 | protein coding | euk     | Small |              | 261416_at   | cytosol       | 8, 4, 7, 5              |    |
| AT2G19720 | RPS15AB                 | protein coding | euk     | Small | CATMA2A18260 | 266684_at   | unclear       |                         |    |

|           |               |                |      |       |              |             |               |                     |    |
|-----------|---------------|----------------|------|-------|--------------|-------------|---------------|---------------------|----|
| AT2G39590 | RPS15AC       | protein coding | euk  | Small |              | 266972_at   | cytosol       |                     |    |
| AT3G46040 | RPS15AD       | protein coding | euk  | Small | CATMA3A39040 | 252566_at   | cytosol       | 5                   |    |
| AT4G29430 | RPS15AE       | protein coding | euk  | Small | CATMA4A31060 | 253726_at   | cytosol       | 5                   |    |
| AT5G59850 | RPS15AF       | protein coding |      | Small | CATMA5A55630 | 247654_at   | cytosol       |                     |    |
| AT5G56940 | RPS16         | protein coding | prok | Small | CATMA5A52690 | 247935_at   | mitochondrion |                     | 32 |
| ATCG00050 | RPS16         | protein coding | prok | Small | C236         | 245049_at   | plastid       |                     |    |
| ATCG00065 | RPS16         | protein coding | prok | Small | C140         | 244939_at   | plastid       |                     |    |
| AT4G34620 | RPS16         | protein coding | prok | Small | CATMA4A36460 | 253201_at   | plastid       | 9, 1                | 32 |
| AT2G09990 | RPS16A        | protein coding | euk  | Small | CATMA2A07930 | 263821_s_at | cytosol       | 4, 2, 5             |    |
| AT3G04230 | RPS16B        | protein coding | euk  | Small | CATMA3A03180 | 258576_at   | cytosol       | 3, 2                |    |
| AT5G18380 | RPS16C        | protein coding | euk  | Small |              |             | cytosol       | 23                  |    |
| AT1G79850 | RPS17         | protein coding | prok | Small | CATMA1A69000 | 260165_at   | plastid       | 9, 6, 2, 1          |    |
| AT3G18880 | RPS17         | protein coding | prok | Small |              | 256654_at   | unclear       |                     |    |
| AT1G49400 | RPS17/emb1129 | protein coding | prok | Small | CATMA1A40520 | 262415_at   | unclear       |                     |    |
| AT2G04390 | RPS17A        | protein coding | euk  | Small |              |             | cytosol       | 3, 8, 4             | 3  |
| AT2G05220 | RPS17B        | protein coding | euk  | Small | CATMA2A04100 |             | mitochondrion |                     |    |
| AT3G10610 | RPS17C        | protein coding | euk  | Small | CATMA3A09650 | 258922_at   | mitochondrion |                     |    |
| AT5G04800 | RPS17D        | protein coding | euk  | Small |              | 250862_s_at | mitochondrion |                     |    |
| AT1G07210 | RPS18         | protein coding | prok | Small |              | 256043_at   | mitochondrion |                     |    |
| ATCG00650 | RPS18         | protein coding | prok | Small | C137         | 244969_at   | plastid       | 9, 6                |    |
| AT1G22780 | RPS18A        | protein coding | euk  | Small | CATMA1A21826 | 264203_at   | cytosol       | 8, 4, 7             |    |
| AT1G34030 | RPS18B        | protein coding | euk  | Small | CATMA1A32275 | 255977_at   | cytosol       | 7                   |    |
| AT4G09800 | RPS18C        | protein coding | euk  | Small | CATMA4A09870 | 255000_at   | nucleus       |                     | 3  |
| AT5G47320 | RPS19         | protein coding | prok | Small | CATMA5A43275 | 248800_at   | mitochondrion |                     |    |
| ATCG00820 | RPS19         | protein coding | prok | Small |              | 244986_at   | plastid       | 9, 6                |    |
| AT3G02080 | RPS19A        | protein coding | euk  | Small | CATMA3A01070 | 258858_at   | cytosol       | 4                   |    |
| AT5G15520 | RPS19B        | protein coding | euk  | Small | CATMA5A13770 | 246538_at   | nucleus       | 3                   |    |
| AT5G61170 | RPS19C        | protein coding | euk  | Small | CATMA5A56820 | 247566_at   | cytosol       | 4                   |    |
| AT3G03600 | RPS2          | protein coding | prok | Small | CATMA3A02530 | 259196_at   | mitochondrion |                     |    |
| AT1G58380 | RPS2A         | protein coding | euk  | Small | CATMA1A48500 | 245841_s_at | cytosol       | 8, 2                |    |
| AT1G59359 | RPS2B         | protein coding | euk  | Small |              |             | cytosol       |                     |    |
| AT2G41840 | RPS2C         | protein coding | euk  | Small | CATMA2A40240 | 260497_at   | cytosol       | 3, 5                |    |
| AT3G57490 | RPS2D         | protein coding | euk  | Small | CATMA3A50490 | 251638_at   | cytosol       |                     |    |
| AT3G33002 | RPS2p         | pseudogene     |      | Small |              |             | unclear       |                     |    |
| AT1G58684 | RPS2E         | protein coding | euk  | Small |              |             | cytosol       |                     |    |
| AT1G58983 | RPS2F         | protein coding | euk  | Small |              |             | cytosol       |                     |    |
| AT3G15190 | RPS20         | protein coding | prok | Small | CATMA3A14550 | 256855_at   | plastid       | 9, 6, 2             |    |
| AT3G45030 | RPS20A        | protein coding | euk  | Small |              | 252601_s_at | cytosol       |                     |    |
| AT3G47370 | RPS20B        | protein coding | euk  | Small | CATMA3A40370 | 252413_at   | cytosol       | 3, 4, 5             |    |
| AT5G62300 | RPS20C        | protein coding | euk  | Small |              |             | cytosol       | 4                   |    |
| AT1G69110 | RPS20         | pseudogene     |      | Small |              |             | unclear       |                     |    |
| AT5G27700 | RPS21C        | protein coding | euk  | Small | CATMA5A25110 | 246747_at   | cytosol       | 23                  |    |
| AT3G27160 | RPS21 GHS1    | protein coding | prok | Small | CATMA3A26960 | 256753_at   | plastid       | 2                   |    |
| AT5G63300 | RPS21 GHS1    | protein coding | prok | Small | CATMA5A58880 |             | plastid       |                     |    |
| AT3G27450 | RPS21A        | pseudogene     | euk  | Small |              | 257738_at   | unclear       |                     |    |
| AT3G53890 | RPS21B        | protein coding | euk  | Small |              | 251921_at   | cytosol       | 5                   |    |
| AT3G09680 | RPS23A        | protein coding | euk  | Small |              | 258712_s_at | cytosol       | 3, 5                |    |
| AT5G02960 | RPS23B        | protein coding | euk  | Small | CATMA5A02060 |             | cytosol       | 5                   |    |
| AT3G04920 | RPS24A        | protein coding | euk  | Small |              | 259090_at   | cytosol       | 3, 8, 4, 7, 5       | 3  |
| AT5G28060 | RPS24B        | protein coding | euk  | Small | CATMA5A25640 | 246730_at   | cytosol       | 5                   |    |
| AT2G16360 | RPS25A        | protein coding | euk  | Small |              | 263602_at   | cytosol       | 3, 2, 7             |    |
| AT2G21580 | RPS25B        | protein coding | euk  | Small | CATMA2A20250 | 263519_at   | cytosol       | 7                   |    |
| AT3G30740 | RPS25C        | pseudogene     |      | Small |              | 266572_at   | unclear       |                     |    |
| AT4G39200 | RPS25E        | protein coding | euk  | Small | CATMA4A40630 | 252912_at   | cytosol       |                     |    |
| AT4G34555 | RPS25F        | protein coding | euk  | Small | CATMA4A36400 | 253202_at   | cytosol       |                     |    |
| AT2G40510 | RPS26A        | protein coding | euk  | Small |              |             | cytosol       | 4, 2                |    |
| AT2G40590 | RPS26B        | protein coding | euk  | Small |              | 255819_s_at | cytosol       |                     |    |
| AT3G56340 | RPS26C        | protein coding | euk  | Small | CATMA3A49310 | 251737_at   | cytosol       |                     |    |
| AT2G45710 | RPS27A        | protein coding | euk  | Small | CATMA2A44110 | 267507_at   | cytosol       | 3, 8                |    |
| AT3G61110 | RPS27B        | protein coding | euk  | Small |              | 251357_at   | cytosol       | 5                   |    |
| AT5G47930 | RPS27D        | protein coding | euk  | Small | CATMA5A43900 | 248747_at   | cytosol       | 8                   |    |
| AT3G61111 | RPS27E        | protein coding | euk  | Small |              |             | cytosol       |                     |    |
| AT1G23410 | RPS27aA       | protein coding | euk  | Small |              | 263016_at   | cytosol       | 8                   |    |
| AT2G47110 | RPS27aB       | protein coding | euk  | Small |              | 266768_s_at | cytosol       |                     |    |
| AT3G62250 | RPS27aC       | protein coding | euk  | Small |              |             | cytosol       |                     |    |
| AT5G64140 | RPS28C        | protein coding | euk  | Small |              | 247267_at   | cytosol       | 5                   |    |
| AT3G10090 | RPS28A        | protein coding | euk  | Small |              | 258937_at   | cytosol       |                     |    |
| AT5G03850 | RPS28B        | protein coding | euk  | Small | CATMA5A03040 | 250895_at   | cytosol       |                     |    |
| AT1G16870 | RPS29         | protein coding | prok | Small | CATMA1A15860 | 256106_at   | mitochondrion |                     |    |
| AT3G43980 | RPS29A        | protein coding | euk  | Small |              | 252693_s_at | unclear       |                     |    |
| AT3G44010 | RPS29B        | protein coding | euk  | Small |              |             | unclear       |                     |    |
| AT4G33865 | RPS29C        | protein coding | euk  | Small |              | 253291_at   | unclear       |                     |    |
| ATMG00090 | RPS3          | protein coding | prok | Small | M018         | 244944_s_at | mitochondrion |                     |    |
| AT2G31610 | RPS3A         | protein coding | euk  | Small | CATMA2A29850 | 263400_s_at | cytosol       | 4, 2, 7             |    |
| AT5G35530 | RPS3C         | protein coding | euk  | Small | CATMA5A30710 | 249700_at   | nucleus       | 3                   | 3  |
| AT3G53870 | RPS3B         | protein coding | euk  | Small | CATMA3A46820 |             | cytosol       | 4, 5                |    |
| ATCG00800 | RPS3aN        | protein coding | prok | Small | C171         | 244984_at   | plastid       | 9, 2                |    |
| AT3G04840 | RPS3aA        | protein coding | euk  | Small | CATMA3A03860 | 259096_at   | cytosol       | 8, 2, 5             |    |
| AT4G34670 | RPS3aB        | protein coding | euk  | Small | CATMA4A36493 | 253248_at   | cytosol       | 3, 8, 5             |    |
| AT2G19750 | RPS30A        | protein coding | euk  | Small | CATMA2A18290 | 266705_at   | cytosol       |                     |    |
| AT4G29390 | RPS30B        | protein coding | euk  | Small | CATMA4A31020 | 253715_at   | nucleus       |                     | 3  |
| AT5G56670 | RPS30C        | protein coding | euk  | Small |              | 247968_at   | cytosol       |                     |    |
| ATCG00380 | RPS4          | protein coding | prok | Small | C084         | 245009_at   | plastid       | 9, 6                |    |
| ATMG00290 | RPS4          | protein coding | prok | Small | M097         | 266042_s_at | mitochondrion | 31                  |    |
| AT5G07090 | RPS4B         | protein coding | euk  | Small | CATMA5A06270 | 250667_at   | cytosol       | 7                   |    |
| AT2G17360 | RPS4A         | protein coding | euk  | Small | CATMA2A16090 | 264849_at   | cytosol       | 8, 2, 7             |    |
| AT5G58420 | RPS4D         | protein coding | euk  | Small | CATMA5A54180 | 247815_at   | cytosol       | 3                   |    |
| AT1G64880 | RPS5          | protein coding | prok | Small | CATMA1A54180 | 262880_at   | mitochondrion | 17                  |    |
| AT2G33800 | RPS5          | protein coding | prok | Small | CATMA2A32000 | 267435_at   | plastid       | 11, 9, 6, 2, 14, 15 |    |
| AT3G11940 | RPS5A         | protein coding | euk  | Small |              |             | cytosol       | 8, 2                |    |
| AT2G37270 | RPS5B         | protein coding | euk  | Small |              | 265963_s_at | cytosol       | 8, 7                |    |
| AT1G64510 | RPS6          | protein coding | prok | Small | CATMA1A53800 | 261954_at   | plastid       | 9, 2, 14            |    |
| AT3G18760 | RPS6          | protein coding | prok | Small | CATMA3A18370 | 257755_at   | unclear       |                     |    |
| AT4G31700 | RPS6A         | protein coding | euk  | Small | CATMA4A33345 | 253487_at   | cytosol       | 3, 8, 2, 10         |    |
| AT5G10360 | RPS6B         | protein coding | euk  | Small | CATMA5A09125 | 250440_at   | cytosol       | 8                   |    |
| AT2G07696 | RPS7          | protein coding | prok | Small | CATMA2A06830 |             | mitochondrion |                     |    |
| ATMG00980 | RPS7          | protein coding | prok | Small | M315         | 263502_s_at | mitochondrion |                     |    |
| ATMG01270 | RPS7          | protein coding | prok | Small |              | 265238_s_at | mitochondrion |                     |    |
| ATCG01240 | RPS7.1        | protein coding | prok | Small |              | 244992_s_at | plastid       | 14, 15              |    |
| ATCG00900 | RPS7.2        | protein coding | prok | Small | C191         |             | plastid       | 9, 2, 15            |    |
| AT1G48830 | RPS7A         | protein coding | euk  | Small | CATMA1A39970 | 256143_at   | cytosol       | 8, 2, 5             |    |
| AT3G02560 | RPS7B         | protein coding | euk  | Small | CATMA3A01530 | 258486_at   | cytosol       |                     |    |
| AT5G16130 | RPS7C         | protein coding | euk  | Small | CATMA5A14420 | 246503_at   | cytosol       | 3, 8                |    |
| AT1G16790 | RPS8          | protein coding | prok | Small | CATMA1A15780 | 255759_at   | plastid       | 9, 13, 1            |    |

|           |           |                |      |       |              |           |               |               |    |
|-----------|-----------|----------------|------|-------|--------------|-----------|---------------|---------------|----|
| ATCG00770 | RPS8      | protein coding | prok | Small | C163         | 244981_at | plastid       | 9             |    |
| AT5G20290 | RPS8A     | protein coding | euk  | Small | CATMA5A18740 | 246068_at | nucleus       | 3, 8, 2       | 3  |
| AT5G59240 | RPS8B     | protein coding | euk  | Small | CATMA5A54990 | 247739_at | unclear       |               |    |
| AT5G06360 | RPS8e     | protein coding | euk  | Small | CATMA5A05570 | 250703_at | cytosol       |               |    |
| AT1G74970 | RPS9      | protein coding | prok | Small | CATMA1A64335 | 262172_at | plastid       | 9, 6, 2, 1    |    |
| AT3G49080 | RPS9      | protein coding | prok | Small | CATMA3A42090 | 252287_at | mitochondrion |               |    |
| AT4G12160 | RPS9A     | pseudogene     | euk  | Small | CATMA4A12280 | 254856_at | unclear       |               |    |
| AT5G15200 | RPS9B     | protein coding | euk  | Small |              | 250159_at | cytosol       | 3, 2, 7       |    |
| AT5G15750 | RPS9D     | protein coding | euk  | Small | CATMA5A14020 | 246527_at | cytosol       |               |    |
| AT5G39850 | RPS9C     | protein coding | euk  | Small |              | 249427_at | cytosol       |               |    |
| AT1G72370 | RPSAa     | protein coding | euk  | Small | CATMA1A61605 | 260426_at | cytosol       | 11, 8, 2      | 21 |
| AT3G04770 | RPSAb     | protein coding | euk  | Small | CATMA3A03785 | 258799_at | cytosol       | 2             |    |
| AT1G47970 | Rpunknown | protein coding |      |       | CATMA1A39060 | 259617_at | nucleus       |               |    |
| AT3G17160 | Rpunknown | protein coding |      |       | CATMA3A16570 | 257879_at | nucleus       |               |    |
| AT4G08695 | Rpunknown | pseudogene     |      |       |              |           | unclear       |               |    |
| AT3G01800 | RRF       | protein coding |      |       | CATMA3A00810 | 258996_at | unclear       | 19            |    |
| AT3G63190 | RRF       | protein coding |      |       | CATMA3A56380 |           | plastid       | 28, 9, 14, 15 |    |

| Bibliographic Reference number | PMID Reference | Citation                 |
|--------------------------------|----------------|--------------------------|
| 1                              | 12938931       | Froehlich et al. 2003    |
| 2                              | 15028209       | Kieffmann et al. 2004    |
| 3                              | 15496452       | Pendle et al. 2005       |
| 4                              | 15574830       | Alexanderson et al. 2004 |
| 5                              | 15734919       | Chang et al. 2005        |
| 6                              | 16207701       | Peltier et al. 2006      |
| 7                              | 17151019       | Jaquinod et al. 2007     |
| 8                              | 17317660       | Benschop et al. 2007     |
| 9                              | 18431481       | Zybailov et al. 2008     |
| 10                             | 18686298       | Whiteman et al. 2008     |
| 11                             | 14617066       | Bae et al. 2003          |
| 12                             | 15141064       | Tian et al. 2004         |
| 13                             | 15322131       | Peltier et al. 2004      |
| 14                             | 14729914       | Friso et al. 2004        |
| 15                             | 11826309       | Peltier et al. 2002      |
| 16                             | 11752383       | Skinner et al. 2001      |
| 17                             | 16618929       | Dunkley et al. 2006      |
| 18                             | 15215502       | Shimaoka et al. 2004     |
| 19                             | 14671022       | Heazlewood et al. 2004   |
| 20                             | 11919680       | Mollier et al. 2002      |
| 21                             | 15610358       | Koroleva et al. 2005     |
| 26                             | 10737809       | Cutler et al. 2000       |
| 22                             | 14505352       | Calikowski et al. 2003   |
| 23                             | 17934214       | Carroll et al. 2008      |
| 24                             | 15821981       | Giavalisco et al. 2005   |
| 25                             | 17432890       | Mitra et al. 2007        |
| 27                             | 16648217       | Giacomelli et al. 2006   |
| 28                             | 18433418       | Ströher et al. 2008      |
| 29                             | 16698901       | Portereiko et al. 2006   |
| 30                             | 12711688       | Mathieu et al. 2003      |
| 31                             | 15276431       | Brugière et al. 2004     |
| 32                             | 18453549       | Ueda et al. 2008         |
| 33                             | 12766230       | Ferro et al. 2003        |
