# Supplementary material for: Transcriptional Regulation of Ribosome Components Are Determined by Stress According to Cellular Compartments in Arabidopsis thaliana
Source: PubMed Central journal article supplement (PMC3229498; doi:10.1371/journal.pone.0028070), 2011-12-02
Supplement: pone.0028070.s003.pdf [file pone.0028070.s003.pdf]

| Gene reference number (AGI) | Gene description                                                                                                                | CATMA ID     |
|-----------------------------|---------------------------------------------------------------------------------------------------------------------------------|--------------|
| AT1G03160                   | unknown protein                                                                                                                 | CATMA1A02050 |
| AT1G03475                   | LIN2 (LESION INITIATION 2); coproporphyrinogen oxidase                                                                          | CATMA1A02350 |
| AT1G13270                   | MAP1C (METHIONINE AMINOPEPTIDASE 1B); metalloexopeptidase                                                                       | CATMA1A12270 |
| AT1G14410                   | unknown protein                                                                                                                 | CATMA1A13410 |
| AT1G21640                   | NADK2; NAD+ kinase                                                                                                              | CATMA1A20720 |
| AT1G50320                   | ATHX; electron transporter/ thiol-disulfide exchange intermediate                                                               | CATMA1A41375 |
| AT2G20890                   | THF1                                                                                                                            | CATMA2A19490 |
| AT2G21330                   | fructose-bisphosphate aldolase                                                                                                  | CATMA2A20020 |
| AT2G28900                   | protein translocase/ protein transporter                                                                                        | CATMA2A27290 |
| AT2G36250                   | FTS22-1; GTP binding / GTPase/ structural molecule                                                                              | CATMA2A34435 |
| AT2G45300                   | 3-phosphoshikimate 1-carboxyvinyltransferase                                                                                    | CATMA2A43700 |
| AT3G01500                   | CA1 (CARBONIC ANHYDRASE 1); carbonate dehydratase/ zinc ion binding                                                             | CATMA3A00490 |
| AT3G06510                   | SFR2 (SENSITIVE TO FREEZING 2); hydrolase, hydrolyzing O-glycosyl compounds                                                     | CATMA3A05650 |
| AT3G22960                   | pyruvate kinase                                                                                                                 | CATMA3A22910 |
| AT3G25690                   | CHUP1 (CHLOROPLAST UNUSUAL POSITIONING 1)                                                                                       | CATMA3A25470 |
| AT3G26570                   | PHT2;1                                                                                                                          | CATMA3A26362 |
| AT3G47070                   | unknown protein                                                                                                                 | CATMA3A40150 |
| AT3G49680                   | branched-chain-amino-acid transaminase/ catalytic                                                                               | CATMA3A42713 |
| AT3G58010                   | unknown protein                                                                                                                 | CATMA3A51010 |
| AT4G00370                   | ANTR2; organic anion transporter                                                                                                | CATMA4B00440 |
| AT4G15560                   | CLA1 (CLOROPLASTOS ALTERADOS 1)                                                                                                 | CATMA4A16296 |
| AT4G26500                   | EMB1374; transcription regulator                                                                                                | CATMA4A28070 |
| AT4G30580                   | ATS2; 1-acylglycerol-3-phosphate O-acyltransferase/ acyltransferase                                                             | CATMA4A32190 |
| AT4G31780                   | MGD1 (MONOGALACTOSYLDIACYLGLYCEROL SYNTHASE 1); 1,2-diacylglycerol 3-beta-galactosyltransferase                                 | CATMA4A33420 |
| AT4G31990                   | ASP5 (ASPARTATE AMINOTRANSFERASE 5)                                                                                             | CATMA4A33665 |
| AT4G32770                   | VTE1 (VITAMIN E DEFICIENT 1)                                                                                                    | CATMA4A34500 |
| AT4G34240                   | ALDH3I1; aldehyde dehydrogenase                                                                                                 | CATMA4A36060 |
| AT4G35770                   | SEN1 (DARK INDUCIBLE 1)                                                                                                         | CATMA4A37425 |
| AT4G36810                   | GGPS1 (GERANYLGERANYL PYROPHOSPHATE SYNTHASE 1); farnesyltransferase                                                            | CATMA4A38380 |
| AT4G37000                   | ACD2 (ACCELERATED CELL DEATH 2)                                                                                                 | CATMA4A38580 |
| AT5G19750                   | unknown protein                                                                                                                 | CATMA5A18170 |
| AT5G35220                   | EGY1 (ETHYLENE-DEPENDENT GRAVITROPISM-DEFICIENT AND YELLOW-GREEN 1); sterol regulatory element-binding protein site 2 protease  | CATMA5A30360 |
| AT5G49030                   | ATP binding / isoleucine-tRNA ligase/ tRNA ligase                                                                               | CATMA5A44970 |
| AT5G49940                   | NFU2                                                                                                                            | CATMA5A45850 |
| AT5G52920                   | pyruvate kinase                                                                                                                 | CATMA5A48800 |
| AT5G55280                   | FTSZ1-1; GTP binding / GTPase/ structural molecule                                                                              | CATMA5A51023 |
| AT5G57850                   | 4-amino-4-deoxychorismate lyase/ catalytic                                                                                      | CATMA5A53600 |
| AT3G02730                   | electron transporter/ thiol-disulfide exchange intermediate                                                                     | CATMA3A01685 |
| AT4G04770                   | ATABC1                                                                                                                          | CATMA4A05320 |
| AT4G38970                   | fructose-bisphosphate aldolase                                                                                                  | CATMA4A40410 |
| AT5G17170                   | electron transporter/ metal ion binding / protein binding                                                                       | CATMA5A15460 |
| AT5G51070                   | ERD1 (EARLY RESPONSIVE TO DEHYDRATION 1); ATP binding / ATPase/ nucleoside-triphosphatase/ nucleotide binding / protein binding | CATMA5A46995 |
| AT2G26670                   | HY1 (HEME OXYGENASE 1)                                                                                                          | CATMA2A24995 |
| AT4G27440                   | PORB (PROTOCHLOROPHYLLIDE OXIDOREDUCTASE B); oxidoreductase/ protochlorophyllide reductase                                      | CATMA4A29015 |
| AT4G35630                   | PSAT; phosphoserine transaminase/ transaminase                                                                                  | CATMA4A37266 |
| AT5G17520                   | RCP1 (ROOT CAP 1)                                                                                                               | CATMA5A15800 |
