# Supplementary material for: Transcriptional Regulation of Ribosome Components Are Determined by Stress According to Cellular Compartments in Arabidopsis thaliana
Source: PubMed Central journal article supplement (PMC3229498; doi:10.1371/journal.pone.0028070), 2011-12-02
Supplement: pone.0028070.s004.pdf [file pone.0028070.s004.pdf]

| Gene reference number (AGI) | Protein short name | CATMA ID probe |
|-----------------------------|--------------------|----------------|
| ATCG00020                   | PSBA               | C002           |
| ATCG00070                   | PSBK               | C015           |
| ATCG00080                   | PSBI tRNA-Ser      | C016           |
| ATCG00120                   | ATPA               | C022           |
| ATCG00210                   | YCF6               | C050           |
| ATCG00220                   | PSBM               | C052           |
| ATCG00270                   | PSBD               | C062           |
| ATCG00280                   | PSBC               | C066           |
| ATCG00300                   | YCF9               | C068           |
| ATCG00350                   | PSAA               | C076           |
| ATCG00420                   | NDHJ               | C093           |
| ATCG00440                   | NDHC               | C097           |
| ATCG00500                   | ACCD               | C110           |
| ATCG00510                   | PSAI               | C115           |
| ATCG00520                   | YCF4               | C116           |
| ATCG00530                   | YCF10              | C118           |
| ATCG00540                   | PETA               | C121           |
| ATCG00590                   | ORF31              | C130           |
| ATCG00600                   | PETG tRNA-Trp      | C131           |
| ATCG00630                   | PSAJ               | C133           |
| ATCG00680                   | PSBB               | C147           |
| ATCG00740                   | RPOA               | C159           |
| ATCG01010                   | NDHF               | C203           |
| ATCG01040                   | YCF5               | C210           |
| ATCG01050                   | NDHD               | C212           |
| ATCG01070                   | NDHE               | C216           |
| ATCG01080                   | NDHG               | C218           |
| ATCG01090                   | NDHI               | C220           |
| ATCG01110                   | NDHH               | C227           |
