# Supplementary material for: Transcriptional Regulation of Ribosome Components Are Determined by Stress According to Cellular Compartments in Arabidopsis thaliana
Source: PubMed Central journal article supplement (PMC3229498; doi:10.1371/journal.pone.0028070), 2011-12-02
Supplement: pone.0028070.s005.pdf [file pone.0028070.s005.pdf]

| Type          | Experiment                          | Project name                | Title                                                                                                               | Pubmed Accession | Organ        | Class | Exp Num |
|---------------|-------------------------------------|-----------------------------|---------------------------------------------------------------------------------------------------------------------|------------------|--------------|-------|---------|
| Senescence    | RIL045LNG 2 / RIL045LN 2            | RA04-08_Senescence          | Transcriptomic analysis of leaf senescence in Arabidopsis thaliana.                                                 | 17098848         | Rosette leaf | 1     | 1       |
| Erwinia       | B14-06h-mutant / B09-06h-WT         | RA05-02_Erwinia             | Regulation of the Arabidopsis transcriptome by the type three secretion system (TTSS) of Erwinia amylovora          |                  | Rosette leaf | 1     | 2       |
| Erwinia       | B16-24h-mutant / B11-24h-WT         | RA05-02_Erwinia             | Regulation of the Arabidopsis transcriptome by the type three secretion system (TTSS) of Erwinia amylovora          |                  | Rosette leaf | 1     | 3       |
| DspA          | Ea dspA_E 24h set2 / Ea wt 24h set2 | RA06-03_DspA-Erwinia        | Regulation of the Arabidopsis transcriptome by the type three effector DspA/E of Erwinia amylovora.                 |                  | Rosette leaf | 1     | 4       |
| DspA          | Ea dspA_E 6h set1 / Ea wt 6h set1   | RA06-03_DspA-Erwinia        | Regulation of the Arabidopsis transcriptome by the type three effector DspA/E of Erwinia amylovora.                 |                  | Rosette leaf | 1     | 5       |
| DspA          | Ea sec 6h set1 / Ea wt 6h set1      | RA06-03_DspA-Erwinia        | Regulation of the Arabidopsis transcriptome by the type three effector DspA/E of Erwinia amylovora.                 |                  | Rosette leaf | 1     | 6       |
| DspA          | Ea sec 6h set2 / Ea wt 6h set2      | RA06-03_DspA-Erwinia        | Regulation of the Arabidopsis transcriptome by the type three effector DspA/E of Erwinia amylovora.                 |                  | Rosette leaf | 1     | 7       |
| Nitrate       | F_C10j+1h Arabido / F_C10j Arabido  | GNP3-B4_Nitrogen_starvation | Improving the nitrogen use efficiency : from model plant to crop species.                                           |                  | Rosette leaf | 2     | 8       |
| Nitrate       | F_C10j+1h Arabido / F_C10j Arabido  | GNP3-B4_Nitrogen_starvation | Improving the nitrogen use efficiency : from model plant to crop species.                                           |                  | Rosette leaf | 2     | 9       |
| TOR           | col 100(u)M / col 10mM              | RA03-07_TOR                 | Transcriptome analysis of TOR (Target of Rapamycin) mutant.                                                         |                  | Roots        | 2     | 10      |
| UV            | WS+UV 1 / WS 1                      | AF09_lignin                 | Lignin mutants and UV stress                                                                                        |                  | Stem         | 2     | 11      |
| UV            | WS+UV 2 / WS 2                      | AF09_lignin                 | Lignin mutants and UV stress                                                                                        |                  | Stem         | 2     | 12      |
| Waterstress   | 35S HAHB4 stressed / 35S HAHB4      | RS04-09_hahb4               | Identification of targets of the transcription factor hahb-4 in relation to abiotic stress                          | 16972869         | Rosette leaf | 3     | 13      |
| Seed dormancy | C50DSb / C10DSb                     | RA04-05_NO3-seed-dormancy   | Nitrate control of Arabidopsis seed dormancy                                                                        | 19074630         | Seeds        | 3     | 14      |
| Seed dormancy | sil50mM / sil10mM                   | RA04-05_NO3-seed-dormancy   | Nitrate control of Arabidopsis seed dormancy                                                                        | 19074630         | Seeds        | 3     | 15      |
| Erwinia       | C14-06h-mutant / C09-06h-WT         | RA05-02_Erwinia             | Regulation of the Arabidopsis transcriptome by the type three secretion system (TTSS) of Erwinia amylovora          |                  | Rosette leaf | 3     | 16      |
| DspA          | Ea dspA_E 6h set2 / Ea wt 6h set2   | RA06-03_DspA-Erwinia        | Regulation of the Arabidopsis transcriptome by the type three effector DspA/E of Erwinia amylovora.                 |                  | Rosette leaf | 3     | 17      |
| Nitrate       | R_C10j+24h Arabido / R_C10j Arabido | GNP3-B4_Nitrogen_starvation | Improving the nitrogen use efficiency : from model plant to crop species.                                           |                  | Roots        | 3     | 18      |
| Nitrate       | R_C10j+24h Arabido / R_C10j Arabido | GNP3-B4_Nitrogen_starvation | Improving the nitrogen use efficiency : from model plant to crop species.                                           |                  | Roots        | 3     | 19      |
| Potyvirus     | Col_LMV_2 / Col_Mock_2              | RA03-02_Potyvirus           | Transcriptional analysis of Arabidopsis thaliana infected by a potyvirus.                                           |                  | Rosette leaf | 3     | 20      |
| Seed dormancy | c50mM-ds / c10mM-ds                 | RA04-05_NO3-seed-dormancy   | Nitrate control of Arabidopsis seed dormancy                                                                        | 19074630         | Seeds        | 3     | 21      |
| Nitrate       | R_C10j Arabido / R_T0 Arabido       | GNP3-B4_Nitrogen_starvation | Improving the nitrogen use efficiency : from model plant to crop species.                                           |                  | Roots        | 3     | 22      |
| Nitrate       | R_C10j Arabido / R_T0 Arabido       | GNP3-B4_Nitrogen_starvation | Improving the nitrogen use efficiency : from model plant to crop species.                                           |                  | Roots        | 3     | 23      |
| Potyvirus     | Cvl_LMV_1 / Cvl_Mock_1              | RA03-02_Potyvirus           | Transcriptional analysis of Arabidopsis thaliana infected by a potyvirus.                                           |                  | Rosette leaf | 3     | 24      |
| Rhodococcus   | 14.D188.(1,2) / 14.D5.(1,2)         | AU05-05_Rhodococcus         | Molecular analysis of symptom development on Arabidopsis Thaliana by the pathogenic bacterium Rhodococcus fascians. | 19118125         | Steam        | 3     | 25      |
| Rhodococcus   | 24.D188.(1,2) / 24.D5.(1,2)         | AU05-05_Rhodococcus         | Molecular analysis of symptom development on Arabidopsis Thaliana by the pathogenic bacterium Rhodococcus fascians. | 19118125         | Steam        | 3     | 26      |
| Rhodococcus   | 24.D5.(1,2) / 14.D5.(1,2)           | AU05-05_Rhodococcus         | Molecular analysis of symptom development on Arabidopsis Thaliana by the pathogenic bacterium Rhodococcus fascians. | 19118125         | Steam        | 3     | 27      |
| Nitrate       | R_C2j Arabido / R_T0 Arabido        | GNP3-B4_Nitrogen_starvation | Improving the nitrogen use efficiency : from model plant to crop species.                                           |                  | Roots        | 3     | 28      |
| Nitrate       | F_C10j Arabido / F_T0 Arabido       | GNP3-B4_Nitrogen_starvation | Improving the nitrogen use efficiency : from model plant to crop species.                                           |                  | Rosette leaf | 4     | 29      |
| Nitrate       | F_C10j Arabido / F_T0 Arabido       | GNP3-B4_Nitrogen_starvation | Improving the nitrogen use efficiency : from model plant to crop species.                                           |                  | Rosette leaf | 4     | 30      |
| Nitrate       | F_C2j Arabido / F_T0 Arabido        | GNP3-B4_Nitrogen_starvation | Improving the nitrogen use efficiency : from model plant to crop species.                                           |                  | Rosette leaf | 4     | 31      |
| Nitrate       | F_C2j Arabido / F_T0 Arabido        | GNP3-B4_Nitrogen_starvation | Improving the nitrogen use efficiency : from model plant to crop species.                                           |                  | Rosette leaf | 4     | 32      |
| Nitrate       | R_C10j+1h Arabido / R_C10j Arabido  | GNP3-B4_Nitrogen_starvation | Improving the nitrogen use efficiency : from model plant to crop species.                                           |                  | Roots        | 4     | 33      |
| Senescence    | RIL232LNG 1 / RIL232LN 1            | RA04-08_Senescence          | Transcriptomic analysis of leaf senescence in Arabidopsis thaliana.                                                 | 17098848         | Rosette leaf | 4     | 34      |
| Potyvirus     | Cvl_LMV_2 / Cvl_Mock_2              | RA03-02_Potyvirus           | Transcriptional analysis of Arabidopsis thaliana infected by a potyvirus.                                           |                  | Rosette leaf | 4     | 35      |
| Nitrate       | R_C2j Arabido / R_T0 Arabido        | GNP3-B4_Nitrogen_starvation | Improving the nitrogen use efficiency : from model plant to crop species.                                           |                  | Roots        | 4     | 36      |
| Potyvirus     | Bl-1_LMV_2 / Bl-1_Mock_2            | RA03-02_Potyvirus           | Transcriptional analysis of Arabidopsis thaliana infected by a potyvirus.                                           |                  | Rosette leaf | 4     | 37      |
| Senescence    | RIL232LNG 2 / RIL232LN 2            | RA04-08_Senescence          | Transcriptomic analysis of leaf senescence in Arabidopsis thaliana.                                                 | 17098848         | Rosette leaf | 4     | 38      |
| Senescence    | RIL310LNG 1 / RIL310LN 1            | RA04-08_Senescence          | Transcriptomic analysis of leaf senescence in Arabidopsis thaliana.                                                 | 17098848         | Rosette leaf | 4     | 39      |
| Senescence    | RIL310LNG 2 / RIL310LN 2            | RA04-08_Senescence          | Transcriptomic analysis of leaf senescence in Arabidopsis thaliana.                                                 | 17098848         | Rosette leaf | 4     | 40      |
| Potyvirus     | Bl-1_LMV_1 / Bl-1_Mock_1            | RA03-02_Potyvirus           | Transcriptional analysis of Arabidopsis thaliana infected by a potyvirus.                                           |                  | Rosette leaf | 4     | 41      |
| Waterstress   | Col0 Stressed / Col0                | RS04-09_hahb4               | Identification of targets of the transcription factor hahb-4 in relation to abiotic stress                          | 16972869         | Rosette leaf | 4     | 42      |
| UV            | EBL87+UV 1 / EBL87 1                | AF09_lignin                 | Lignin mutants and UV stress                                                                                        |                  | Stem         | 4     | 43      |
| UV            | EBL87+UV 2 / EBL87 2                | AF09_lignin                 | Lignin mutants and UV stress                                                                                        |                  | Stem         | 4     | 44      |
| Senescence    | RIL045LNG 1 / RIL045LN 1            | RA04-08_Senescence          | Transcriptomic analysis of leaf senescence in Arabidopsis thaliana.                                                 | 17098848         | Rosette leaf | 4     | 45      |
| LAR           | LAR_06h_T / LAR_06h_C               | TRI38-LAR                   | Transcriptomic analysis of the localized acquired resistance phenomenon (LAR) in Arabidopsis Thaliana.              |                  | Rosette leaf | 4     | 46      |
| LAR           | LAR_24h_T / LAR_24h_C               | TRI38-LAR                   | Transcriptomic analysis of the localized acquired resistance phenomenon (LAR) in Arabidopsis Thaliana.              |                  | Rosette leaf | 4     | 47      |
| LAR           | LAR_48h_T / LAR_48h_C               | TRI38-LAR                   | Transcriptomic analysis of the localized acquired resistance phenomenon (LAR) in Arabidopsis Thaliana.              |                  | Rosette leaf | 4     | 48      |
| LAR           | HR-6h-T / HR-6h-C                   | TRI38-LAR                   | Transcriptomic analysis of the localized acquired resistance phenomenon (LAR) in Arabidopsis Thaliana.              |                  | Rosette leaf | 4     | 49      |
