# Supplementary material for: Transcriptional Regulation of Ribosome Components Are Determined by Stress According to Cellular Compartments in Arabidopsis thaliana
Source: PubMed Central journal article supplement (PMC3229498; doi:10.1371/journal.pone.0028070), 2011-12-02
Supplement: pone.0028070.s006.pdf [file pone.0028070.s006.pdf]

| Gene reference number (AGI) | Common Gene Name | CATMA ID     | Affymetrix ID | ms/ms localisation evidences | GFP localisation evidences |
|-----------------------------|------------------|--------------|---------------|------------------------------|----------------------------|
| AT2G42710                   | RPL1             | CATMA2A41110 | 263975_at     |                              |                            |
| AT2G07715                   | RPL2             | CATMA2A07160 |               |                              |                            |
| AT2G44065                   | RPL2             | CATMA2A42495 | 267211_at     |                              |                            |
| ATMG00560                   | RPL2             | M164         | 265232_s_at   |                              |                            |
| ATMG00690                   | RPL2             | M273         | 244906_at     |                              |                            |
| AT3G17465                   | RPL3/ RPL3P      | CATMA3A16900 | 258404_at     | 19                           |                            |
| AT2G20060                   | RPL4             | CATMA2A18540 | 265594_at     |                              |                            |
| ATMG00210                   | RPL5             | M067         | 266044_s_at   |                              |                            |
| AT5G53070                   | RPL9             | CATMA5A48970 | 248295_at     |                              |                            |
| AT3G12370                   | RPL10            | CATMA3A11320 | 256234_at     |                              |                            |
| AT4G35490                   | RPL11            | CATMA4A37150 | 253138_at     |                              |                            |
| AT1G70190                   | RPL12            | CATMA1A59480 | 264702_at     | 19                           |                            |
| AT4G36420                   | RPL12            | CATMA4A38000 | 246210_at     |                              |                            |
| AT4G37660                   | RPL12            | CATMA4A39180 | 253058_at     |                              |                            |
| AT3G01790                   | RPL13            | CATMA3A00800 | 258995_at     |                              |                            |
| AT1G17560                   | RPL14/ HLL       | CATMA1A16610 | 260683_at     | 15                           |                            |
| AT5G46160                   | RPL14/ HLP       | CATMA5A42160 | 248878_at     |                              | 15                         |
| AT4G23620                   | RPL15            | CATMA4A25470 | 254228_at     |                              |                            |
| AT5G64670                   | RPL15            | CATMA5A60100 | 247249_at     |                              |                            |
| ATMG00080                   | RPL16            | M015         |               |                              |                            |
| AT5G64650                   | RPL17            | CATMA5A60080 | 247247_at     |                              |                            |
| AT5G09770                   | RPL17family      | CATMA5A08580 | 250495_at     |                              |                            |
| AT3G22450                   | RPL18N           | CATMA3A22450 | 258447_at     |                              |                            |
| AT3G45020                   | RPL18N           | CATMA3A38040 |               |                              |                            |
| AT1G08845                   | RPL18N           | CATMA1A07750 |               |                              |                            |
| AT1G24240                   | RPL19            | CATMA1A23130 | 264874_at     |                              |                            |
| AT4G11630                   | RPL19            |              |               |                              |                            |
| AT4G16030                   | RPL19D           | CATMA4A16813 | 245471_at     |                              |                            |
| AT3G03600                   | RPS2             | CATMA3A02530 | 259196_at     |                              |                            |
| AT1G16870                   | RPS29            | CATMA1A15860 | 256106_at     |                              |                            |
| ATMG00090                   | RPS3             | M018         | 244944_s_at   |                              |                            |
| ATMG00290                   | RPS4             | M097         | 266042_s_at   | 31                           |                            |
| AT1G64880                   | RPS5             | CATMA1A54180 | 262880_at     | 17                           |                            |
| AT3G18760                   | RPS6             | CATMA3A18370 | 257755_at     |                              |                            |
| AT2G07696                   | RPS7             | CATMA2A06830 |               |                              |                            |
| ATMG00980                   | RPS7             | M315         | 263502_s_at   |                              |                            |
| ATMG01270                   | RPS7             |              | 265238_s_at   |                              |                            |
| AT3G49080                   | RPS9             | CATMA3A42090 | 252287_at     |                              |                            |
| AT3G22300                   | RPS10            | CATMA3A22295 | 258454_at     |                              |                            |
| AT1G31817                   | RPS11/NFD3       | CATMA1A30070 | 246266_at     |                              |                            |
| AT2G07679                   | RPS12            |              |               |                              |                            |
| AT2G07675                   | RPS12            | CATMA2A06470 |               |                              |                            |
| AT1G77750                   | RPS13            | CATMA1A66900 | 259678_at     |                              | 20                         |
| AT2G34520                   | RPS14            | CATMA2A32660 | 266955_at     |                              |                            |
| AT1G15810                   | RPS15            |              | 259505_at     |                              |                            |
| AT1G80620                   | RPS15            | CATMA1A69830 |               |                              |                            |
| AT5G56940                   | RPS16            | CATMA5A52690 | 247935_at     |                              | 32                         |
| AT2G05220                   | RPS17B           | CATMA2A04100 |               |                              |                            |
| AT3G10610                   | RPS17C           | CATMA3A09650 | 258922_at     |                              |                            |
| AT5G04800                   | RPS17D           |              | 250862_s_at   |                              |                            |
| AT1G07210                   | RPS18            |              | 256043_at     |                              |                            |
| AT5G47320                   | RPS19            | CATMA5A43275 | 248800_at     |                              |                            |
| AT1G16740                   | RPL20            |              | 255767_at     |                              |                            |
| AT1G57860                   | RPL21G           |              | 246379_s_at   |                              |                            |
| AT4G30930                   | RPL21/ NFD1      | CATMA4A32590 | 253549_at     |                              | 29                         |
| AT1G09690                   | RPL21C           | CATMA1A08550 | 264679_s_at   |                              |                            |
| AT1G52370                   | RPL22            | CATMA1A43430 |               |                              |                            |
| AT4G28360                   | RPL22            | CATMA4A30000 | 253773_s_at   | 31                           |                            |
| AT1G04480                   | RPL23A           |              | 263665_at     |                              |                            |
| AT3G04400                   | RPL23C           | CATMA3A03370 | 258569_at     |                              |                            |
| AT4G39880                   | RPL23N           | CATMA4A41270 | 252850_at     |                              |                            |
| AT5G66860                   | RPL25            | CATMA5A62290 |               | 19                           |                            |
| AT2G16930                   | RPL27            |              | 266535_s_at   |                              |                            |
| AT5G15220                   | RPL27            |              |               |                              |                            |
| AT5G39800                   | RPL27            |              | 249424_s_at   |                              |                            |
| AT1G07830                   | RPL29            | CATMA1A06860 | 261418_at     |                              |                            |
| AT5G55140                   | RPL30            | CATMA5A50910 | 248102_at     |                              |                            |
| AT1G07070                   | RPL35aA          | CATMA1A06140 | 256065_at     |                              |                            |
| AT3G55750                   | RPL35aD          |              |               |                              |                            |
| AT5G40080                   | RPL41            |              |               |                              |                            |
| AT3G59650                   | RPL51/S25        | CATMA3A52680 | 251483_at     |                              |                            |
