# Supplementary material for: Transcriptional Regulation of Ribosome Components Are Determined by Stress According to Cellular Compartments in Arabidopsis thaliana
Source: PubMed Central journal article supplement (PMC3229498; doi:10.1371/journal.pone.0028070), 2011-12-02
Supplement: pone.0028070.s007.pdf [file pone.0028070.s007.pdf]

| Gene reference number (AGI) | Common Gene Name | CATMA ID     | Affymetrix ID | ms/ms evidences        | localization | GFP localization evidences |
|-----------------------------|------------------|--------------|---------------|------------------------|--------------|----------------------------|
| AT5G24490                   | PSRP-1           |              | 249742_at     | 9, 2                   |              |                            |
| AT3G52150                   | PSRP-2           | CATMA3A45070 | 252032_at     | 9, 27, 6, 2, 14, 1, 15 |              |                            |
| AT1G68590                   | PSRP-3           |              | 262283_at     | 9, 2, 14               |              |                            |
| AT5G15760                   | PSRP-3           | CATMA5A14030 | 246517_at     |                        |              |                            |
| AT2G38140                   | PSRP-4           | CATMA2A36435 | 267088_at     | 9                      |              | 26                         |
| AT3G56910                   | PSRP-5           |              | 246294_at     | 9, 2, 14, 1            |              |                            |
| AT5G17870                   | PSRP-6           | CATMA5A16150 | 250058_at     |                        |              |                            |
| AT4G29060                   | PSRP-7           |              |               |                        |              |                            |
| AT3G63490                   | RPL1             |              | 251120_at     | 11, 9, 6,13, 2         |              |                            |
| ATCG00830                   | RPL2.1           | C175         |               | 9                      |              |                            |
| ATCG01310                   | RPL2.2           |              | 244987_s_at   |                        |              |                            |
| AT2G43030                   | RPL3related      | CATMA2A41430 | 265247_at     | 9, 6, 2                |              |                            |
| AT1G07320                   | RPL4             | CATMA1A06385 | 261078_at     | 11, 9, 6,13, 2, 14, 15 |              |                            |
| AT4G01310                   | RPL5 family      | CATMA4A01510 | 255623_at     | 9, 6, 2, 1             |              |                            |
| AT1G05190                   | RPL6 /emb2394    | CATMA1A04040 | 264575_at     | 9, 6, 2, 1             |              |                            |
| AT3G44890                   | RPL9/ CL9        | CATMA3A37910 | 246339_at     | 9, 6, 2                |              |                            |
| AT5G13510                   | RPL10            |              | 245852_at     | 9, 6                   |              |                            |
| AT1G06380                   | RPL10a related   | CATMA1A05420 | 259392_at     | 9, 1                   |              |                            |
| AT1G32990                   | RPL11            | CATMA1A31300 | 261190_at     | 9, 6, 2, 1             |              |                            |
| AT5G51610                   | RPL11            | CATMA5A47540 | 248414_at     |                        |              |                            |
| AT3G27830                   | RPL12A           |              |               | 4, 9, 27,13, 2, 14     |              |                            |
| AT3G27840                   | RPL12B           | CATMA3A27650 | 257223_at     |                        |              |                            |
| AT3G27850                   | RPL12C           |              | 257225_s_at   | 27,13, 2, 14, 1        |              |                            |
| AT1G78630                   | RPL13A           | CATMA1A67690 | 263131_at     | 9, 6, 2, 1             |              |                            |
| ATCG00780                   | RPL14/ HLL       | C165         | 244982_at     | 9                      |              |                            |
| AT3G25920                   | RPL15            | CATMA3A25740 | 258076_at     | 9, 6, 2                |              |                            |
| ATCG00790                   | RPL16            | C168         | 244983_at     | 9                      |              |                            |
| AT3G54210                   | RPL17            | CATMA3A47150 | 251883_at     | 9                      |              |                            |
| AT3G20230                   | RPL18N           | CATMA3A19890 | 257132_at     |                        |              |                            |
| AT5G13720                   | RPL18N           |              | 250247_at     | 9, 33                  |              |                            |
| AT1G48350                   | RPL18N           | CATMA1A39430 | 262235_at     | 9, 1                   |              |                            |
| AT4G17560                   | RPL19            | CATMA4A18580 | 245357_at     | 9, 1                   |              |                            |
| AT5G47190                   | RPL19            | CATMA5A43180 | 248798_at     | 9, 1                   |              |                            |
| ATCG00660                   | RPL20            | C139         | 244970_at     | 9                      |              |                            |
| AT1G35680                   | RPL21/ CL21      | CATMA1A33866 | 262029_at     | 11, 9, 6, 2, 1         |              |                            |
| ATCG00810                   | RPL22            |              | 244985_at     | 9                      |              |                            |
| ATCG00840                   | RPL23.1          | C178         |               | 9                      |              |                            |
| ATCG01300                   | RPL23.2          |              | 244988_s_at   |                        |              |                            |
| AT5G54600                   | RPL24            | CATMA5A50455 | 248174_at     | 9                      |              |                            |
| AT5G40950                   | RPL27            | CATMA5A36620 | 249331_at     | 9, 6, 2, 14, 15        |              |                            |
| AT2G33450                   | RPL28            | CATMA2A31610 | 255850_at     | 9,                     |              |                            |
| AT5G65220                   | RPL29            | CATMA5A60610 | 247201_at     | 9, 2, 1                |              |                            |
| AT1G75350                   | RPL31            | CATMA1A64680 | 261119_at     | 9, 6, 1                |              |                            |
| ATCG01020                   | RPL32            | C207         | 244960_at     |                        |              |                            |
| ATCG00640                   | RPL33            | C135         | 244968_at     | 9                      |              |                            |
| AT1G29070                   | RPL34            | CATMA1A27050 | 260898_at     |                        |              |                            |
| AT2G24090                   | RPL35family      | CATMA2A22440 | 266570_at     | 9                      |              |                            |
| ATCG00760                   | RPL36            | C162         | 244980_at     | 9                      |              |                            |
| AT1G71720                   | RPS1             | CATMA1A60920 | 261507_at     |                        |              |                            |
| AT5G30510                   | RPS1             | CATMA5A27970 |               | 9, 27, 2               |              |                            |
| AT3G23700                   | RPS1             | CATMA3A23650 | 257172_at     | 11, 9, 2               |              |                            |
| ATCG00800                   | RPS3aN           | C171         | 244984_at     | 9, 2                   |              |                            |
| ATCG00380                   | RPS4             | C084         | 245009_at     | 9, 6                   |              |                            |
| AT2G33800                   | RPS5             | CATMA2A32000 | 267435_at     | 11, 9, 6, 2, 14, 15    |              |                            |
| AT1G64510                   | RPS6             | CATMA1A53800 | 261954_at     | 9, 2, 14               |              |                            |

|           |            |              |             |            |    |
|-----------|------------|--------------|-------------|------------|----|
| ATCG01240 | RPS7.1     |              | 244992_s_at | 14, 15     |    |
| ATCG00900 | RPS7.2     | C191         |             | 9, 2, 15   |    |
| AT1G16790 | RPS8       | CATMA1A15780 | 255759_at   | 9,13, 1    |    |
| ATCG00770 | RPS8       | C163         | 244981_at   | 9          |    |
| AT1G74970 | RPS9       | CATMA1A64335 | 262172_at   | 9, 6, 2, 1 |    |
| AT3G13120 | RPS10      | CATMA3A12140 | 257190_at   | 9          |    |
| ATCG00750 | RPS11      |              | 244979_at   | 9          |    |
| ATCG00160 | RPS12      | C033         | 244996_at   | 9          |    |
| ATCG00905 | RPS12      | C193         |             |            |    |
| ATCG01230 | RPS12      |              | 244940_at   |            |    |
| AT5G14320 | RPS13      | CATMA5A12555 | 250190_at   | 9, 2, 1    | 20 |
| ATCG00330 | RPS14      | C071         | 245005_at   | 9          |    |
| ATCG01120 | RPS15      | C230         | 244938_at   | 9, 6       |    |
| ATCG00050 | RPS16      | C236         | 245049_at   |            |    |
| ATCG00065 | RPS16      | C140         | 244939_at   |            |    |
| AT4G34620 | RPS16      | CATMA4A36460 | 253201_at   | 9, 1       | 32 |
| AT1G79850 | RPS17      | CATMA1A69000 | 260165_at   | 9, 6, 2, 1 |    |
| ATCG00650 | RPS18      | C137         | 244969_at   | 9, 6       |    |
| ATCG00820 | RPS19      |              | 244986_at   | 9, 6       |    |
| AT3G15190 | RPS20      | CATMA3A14550 | 256855_at   | 9, 6, 2    |    |
| AT3G27160 | RPS21 GHS1 | CATMA3A26960 | 256753_at   | 2          |    |
| AT5G63300 | RPS21 GHS1 | CATMA5A58880 |             |            |    |
